# Supplementary material
Source: MDPI journal article supplement (https://www.mdpi.com/2673-6004/2/3/19)
Supplement: s1 [file s1]

Archive with 1 entries (1 files):
- birds-1294245-supplementary.pdf
