# Supplementary material
Source: MDPI journal article supplement (https://www.mdpi.com/2673-6004/2/3/19)
Supplement: s1 [file s1 › birds-1294245-supplementary.pdf]

## Supplementary Files

**Table S1.** Summary of distance estimates (meters) from traditional human observer collected point-count data of four species of riparian birds, Lower Verde River, Arizona (USA). We established 21 point-count stations at three study reaches (Beasley Flat n=7, Childs n=8, Sheep Bridge n=6) and surveyed each point twice during May 2018. Shading separates species and no Yellow-billed Cuckoos were detected from point-counts (NA).

| Species              | Reach        | Distance mean | Distance range |
|----------------------|--------------|---------------|----------------|
| Bell's Vireo         | Beasley Flat | 68.3          | 10-140         |
|                      | Childs       | 44.4          | 20-100         |
|                      | Sheep Bridge | 40.9          | 14-84          |
| Summer Tanager       | Beasley Flat | 34.6          | 12-78          |
|                      | Childs       | 32.2          | 1-70           |
|                      | Sheep Bridge | 33.1          | 16-49          |
| Yellow Warbler       | Beasley Flat | 35.0          | 9-104          |
|                      | Childs       | 27.2          | 2-77           |
|                      | Sheep Bridge | 28.7          | 5-72           |
| Yellow-billed Cuckoo | Beasley Flat | NA            | NA             |
|                      | Childs       | NA            | NA             |
|                      | Sheep Bridge | NA            | NA             |

**Table S2.** Recording data used in acoustic classifier training for Bell's Vireo, Summer Tanager, and Yellow Warbler (shading separates species) obtained from the Macaulay Library of the Cornell Lab of Ornithology ([www.macaulaylibrary.org](http://www.macaulaylibrary.org)) or Xeno-Canto sound library ([www.xeno-canto.org](http://www.xeno-canto.org)).

| Species        | Recording ID | Source     |
|----------------|--------------|------------|
| Bell's Vireo   | 11717        | Macaulay   |
|                | 11720        | Macaulay   |
|                | 17186        | Macaulay   |
|                | 18779        | Macaulay   |
|                | 20830        | Macaulay   |
| Summer Tanager | XC35381      | Xeno-Canto |
|                | XC135246     | Xeno-Canto |
|                | XC234333     | Xeno-Canto |
|                | XC294192     | Xeno-Canto |
|                | XC323197     | Xeno-Canto |
|                | XC375024     | Xeno-Canto |
|                | XC493555     | Xeno-Canto |
|                | XC494696     | Xeno-Canto |
| Yellow Warbler | XC80613      | Xeno-Canto |
|                | XC144117     | Xeno-Canto |
|                | XC179548     | Xeno-Canto |
|                | XC288474     | Xeno-Canto |
|                | XC292932     | Xeno-Canto |
|                | XC314487     | Xeno-Canto |
|                | XC384901     | Xeno-Canto |

**Table S3.** Each acoustic recorder had some duration of malfunction and did not record data, or some song files were corrupted for each of the four species. Recorder were deployed in 2018 from 6 May to 2 Sept at Beasley Flat (plots B1-B3) and Childs (C1-C3), and from 20 May to 2 Sept at Sheep Bridge (S1-S3). Shading separates reaches. Numbers in the table show the number of days with no data.

|    | Yellow Warbler |      |      |     | Bell's Vireo |      |      |     | Summer Tanager |      |      |     | Yellow-billed Cuckoo |      |      |     |
|----|----------------|------|------|-----|--------------|------|------|-----|----------------|------|------|-----|----------------------|------|------|-----|
|    | May            | June | July | Aug | May          | June | July | Aug | May            | June | July | Aug | May                  | June | July | Aug |
| B1 |                |      | 5    |     |              |      | 5    |     |                |      | 5    |     |                      |      | 6    | 21  |
| B2 |                |      | 5    |     |              |      | 5    |     |                |      | 5    |     | 1                    |      | 9    | 19  |
| B3 |                | 22   | 18   |     |              | 22   | 18   |     |                | 22   | 18   |     | 22                   |      | 18   | 5   |
| C1 |                |      | 1    |     |              |      | 1    |     |                |      |      |     |                      |      | 1    |     |
| C2 |                |      | 2    |     |              |      | 2    |     |                |      | 2    |     |                      |      | 2    |     |
| C3 | 4              |      | 2    |     | 4            |      | 2    |     | 4              |      | 2    |     | 4                    |      | 2    |     |
| S1 |                | 1    |      |     |              | 1    |      |     |                | 1    |      |     |                      | 1    |      | 8   |
| S2 |                | 22   | 11   |     |              | 22   | 11   |     |                | 29   | 9    |     |                      | 22   | 13   | 14  |
| S3 |                | 1    |      |     |              | 1    |      |     |                | 1    |      |     | 2                    | 6    | 14   | 27  |

**Table S4.** To compare the relative rank of bird quantification by point-count methods (n = 21 and measures number of individuals) versus passive acoustic recorders (n = 9 and measures number of days), we used a non-parametric rank test. Rank was specific to the method (point count vs. acoustic recorders) with the most birds counted or days detected ranked as 1 and the fewest ranked at 12. Raw data from three study reaches along the Lower Verde River, Arizona (USA). Shading separates species.

| Species                 | Reach        | Abundance<br>(individuals) point-<br>count surveys | Rank | Days detected<br>by acoustic<br>recorders | Rank |
|-------------------------|--------------|----------------------------------------------------|------|-------------------------------------------|------|
| Bell's Vireo            | Beasley Flat | 1                                                  | 9    | 35                                        | 9    |
|                         | Childs       | 8                                                  | 3.5  | 108                                       | 1    |
|                         | Sheep        | 4                                                  | 7    | 57                                        | 7.5  |
|                         | Bridge       |                                                    |      |                                           |      |
| Summer Tanager          | Beasley Flat | 5                                                  | 6    | 72                                        | 4    |
|                         | Childs       | 7                                                  | 5    | 80                                        | 2    |
|                         | Sheep        | 3                                                  | 8    | 57                                        | 7.5  |
|                         | Bridge       |                                                    |      |                                           |      |
| Yellow Warbler          | Beasley Flat | 8                                                  | 3.5  | 68                                        | 5    |
|                         | Childs       | 13                                                 | 1    | 64                                        | 6    |
|                         | Sheep        | 9                                                  | 2    | 76                                        | 3    |
|                         | Bridge       |                                                    |      |                                           |      |
| Yellow-billed<br>Cuckoo | Beasley Flat | 0                                                  | 11   | 4                                         | 11   |
|                         | Childs       | 0                                                  | 11   | 10                                        | 10   |
|                         | Sheep        | 0                                                  | 11   | 2                                         | 12   |
|                         | Bridge       |                                                    |      |                                           |      |

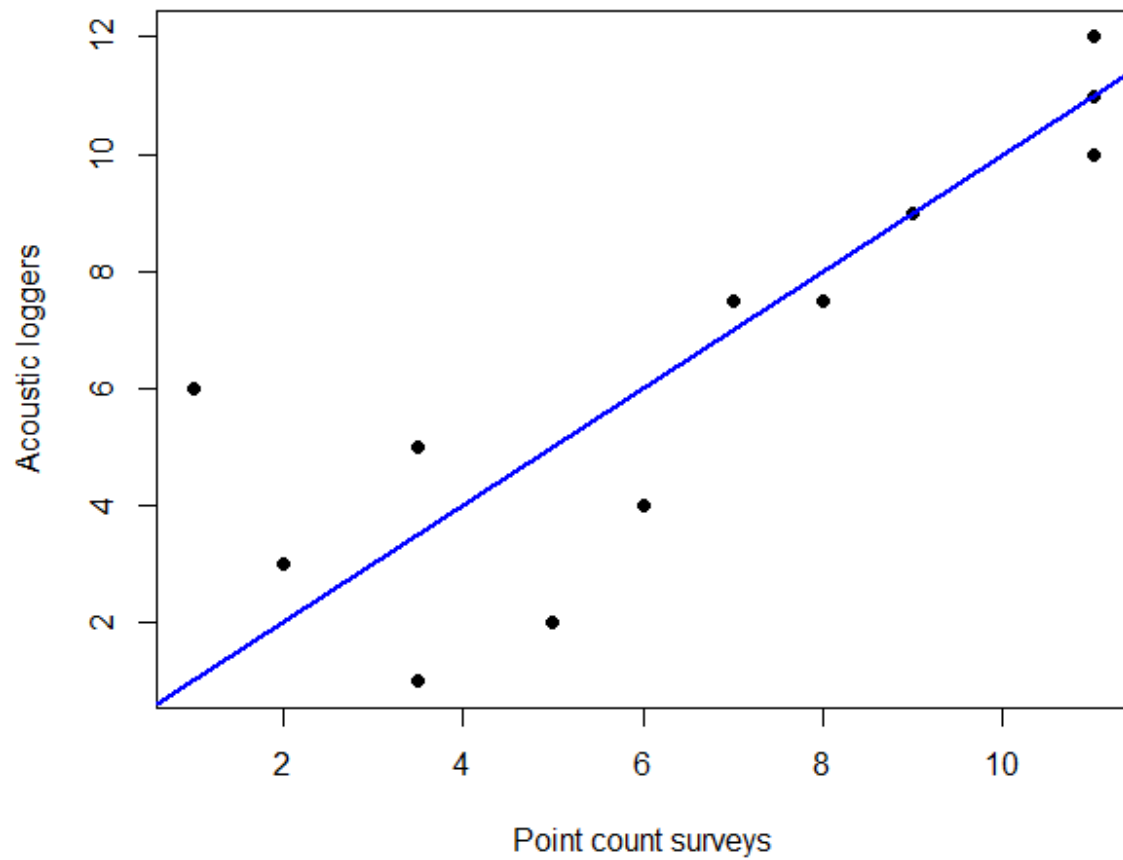

**Figure S1.** Comparison of the relative rank of quantification of birds by point-count methods or by passive acoustic recorders. Blue line is 1:1 ratio and points are species by reach (raw data in Table S4). On the X and Y axis, Rank 1 has the most birds/bird activity quantified and Rank 12 has the fewest. Methods were similar in ranking results (Wilcoxon signed-rank test:  $V=29.5$ ,  $P=0.878$ ).
